# Supplementary material
Source: PubMed Central journal article supplement (PMC7587099)
Supplement: JCM.01468-20-s0001.pdf [file JCM.01468-20-s0001.pdf]

Table S1. Antimicrobial susceptibility test distribution by onset ( $\leq$  Day 2 of admission vs  $>$  Day 2 of admission) for the most common etiologic agents of HAP/VAP

| Etiologic agents                              | Antimicrobial susceptibility testing<br>(within 2 days of admission) |      |      | Antimicrobial susceptibility testing<br>( $>$ Day 2 of admission) |      |      |
|-----------------------------------------------|----------------------------------------------------------------------|------|------|-------------------------------------------------------------------|------|------|
|                                               | No. of isolates                                                      | N    | %    | No. of isolates                                                   | N    | %    |
| <b>Gram positive, monomicrobial</b>           |                                                                      |      |      |                                                                   |      |      |
| <i>Staphylococcus aureus</i>                  | 2967                                                                 | 2732 | 92.1 | 3237                                                              | 2960 | 91.4 |
| <i>Streptococcus pneumoniae</i>               | 919                                                                  | 791  | 86.1 | 211                                                               | 178  | 84.3 |
| <b>Gram negative, monomicrobial</b>           |                                                                      |      |      |                                                                   |      |      |
| <i>Acinetobacter</i> spp.                     | 151                                                                  | 138  | 91.4 | 177                                                               | 165  | 93.2 |
| <i>Escherichia coli</i>                       | 455                                                                  | 432  | 94.9 | 627                                                               | 590  | 94.1 |
| <i>Enterobacter</i> spp.                      | 255                                                                  | 241  | 94.5 | 595                                                               | 575  | 96.6 |
| <i>Haemophilus</i> spp. (full AST)            | 1159                                                                 | 330  | 28.5 | 430                                                               | 117  | 27.2 |
| <i>Haemophilus</i> spp. (beta-lactamase test) | 1159                                                                 | 703  | 60.7 | 430                                                               | 284  | 66.0 |
| <i>Klebsiella</i> spp.                        | 596                                                                  | 572  | 96.0 | 788                                                               | 745  | 94.5 |
| <i>Pseudomonas aeruginosa</i>                 | 1866                                                                 | 1695 | 90.8 | 1643                                                              | 1517 | 92.3 |
| <i>Serratia marcescens</i>                    | 222                                                                  | 209  | 94.1 | 308                                                               | 285  | 92.5 |
| <i>Stenotrophomonas maltophilia</i>           | 200                                                                  | 183  | 91.5 | 447                                                               | 402  | 89.9 |

Table S2. Antimicrobial susceptibility test distribution by mechanical ventilation status for the most common etiologic agents of HAP/VAP

| Etiologic agents                              | Antimicrobial susceptibility testing<br>(mechanically ventilation) |      |      | Antimicrobial susceptibility testing<br>(no mechanical ventilation) |      |      |
|-----------------------------------------------|--------------------------------------------------------------------|------|------|---------------------------------------------------------------------|------|------|
|                                               | No. of isolates                                                    | N    | %    | No. of isolates                                                     | N    | %    |
| <b>Gram positive, monomicrobial</b>           |                                                                    |      |      |                                                                     |      |      |
| <i>Staphylococcus aureus</i>                  | 4248                                                               | 3915 | 92.2 | 1956                                                                | 1777 | 90.4 |
| <i>Streptococcus pneumoniae</i>               | 636                                                                | 542  | 85.2 | 494                                                                 | 425  | 86.0 |
| <b>Gram negative, monomicrobial</b>           |                                                                    |      |      |                                                                     |      |      |
| <i>Acinetobacter</i> spp.                     | 232                                                                | 212  | 91.4 | 96                                                                  | 91   | 94.8 |
| <i>Escherichia coli</i>                       | 694                                                                | 660  | 95.1 | 388                                                                 | 362  | 93.3 |
| <i>Enterobacter</i> spp.                      | 592                                                                | 571  | 96.5 | 258                                                                 | 245  | 95.0 |
| <i>Haemophilus</i> spp. (full AST)            | 860                                                                | 285  | 33.1 | 729                                                                 | 162  | 22.2 |
| <i>Haemophilus</i> spp. (beta-lactamase test) | 860                                                                | 550  | 64.0 | 729                                                                 | 427  | 58.6 |
| <i>Klebsiella</i> spp.                        | 965                                                                | 917  | 95.0 | 419                                                                 | 400  | 95.5 |
| <i>Pseudomonas aeruginosa</i>                 | 1724                                                               | 1581 | 91.7 | 1785                                                                | 1633 | 91.5 |
| <i>Serratia marcescens</i>                    | 350                                                                | 328  | 93.7 | 180                                                                 | 166  | 92.2 |
| <i>Stenotrophomonas maltophilia</i>           | 391                                                                | 348  | 89.0 | 256                                                                 | 236  | 92.2 |
